# Supplementary material for: TGF-β downstream of Smad3 and MAPK signaling antagonistically regulate the viability and partial epithelial–mesenchymal transition of liver progenitor cells
Source: publisher site journal article supplement (doi:10.18632/aging.205725), 2024-04-05
Supplement: Supplementary file [file aging-v16i7-205725-supplementary-material-SD2.pdf]

## SUPPLEMENTARY TABLES

**Supplementary Table 1. Reagents used in this study.**

| Reagent                                         | Source and identifier                                        |
|-------------------------------------------------|--------------------------------------------------------------|
| Recombinant human TGF- $\beta$ 1 (carrier-free) | 580706, BioLegend, San Diego, CA, USA                        |
| U0126-EtOH                                      | S1102, Selleck, Houston, TX, USA                             |
| SP600125                                        | 1496, Tocris, Bristol, United Kingdom                        |
| SB203580 (Adezmapimod)                          | S1076, Selleck, Houston, TX, USA                             |
| Actin-Tracker Red-555                           | C2203S, Beyotime Institute of Biotechnology, Shanghai, China |

**Supplementary Table 2. Antibodies used in this study.**

| Antigens                                                | Source and identifier                                          | Application    |
|---------------------------------------------------------|----------------------------------------------------------------|----------------|
| Phospho-Smad2 (Ser465/467)                              | #3108, Cell Signaling Technology, Beverly, MA, USA             | 1:2000 for WB  |
| Phospho-Smad3 (Ser423/425)                              | ab52903, Abcam, Cambridge, UK                                  | 1:1000 for WB  |
| Phospho-Smad2 (Ser245/250/255)                          | #3104, Cell Signaling Technology, Beverly, MA, USA             | 1:1000 for WB  |
| Phospho-Smad3 (Thr179)                                  | ab74062, Abcam, Cambridge, UK                                  | 1:1000 for WB  |
| Phospho-Smad3 (Ser213)                                  | ab63403, Abcam, Cambridge, UK                                  | 1:1000 for WB  |
| Phospho-Smad3 (Ser204)                                  | ab63402, Abcam, Cambridge, UK                                  | 1:1000 for WB  |
| Phospho-Smad3 (Ser208)                                  | ab138659, Abcam, Cambridge, UK                                 | 1:1000 for WB  |
| Smad2                                                   | ab40855, Abcam, Cambridge, UK                                  | 1:2000 for WB  |
| Smad3                                                   | ab40854, Abcam, Cambridge, UK                                  | 1:2000 for WB  |
| Smad4                                                   | ab40759, Abcam, Cambridge, UK                                  | 1:2000 for WB  |
| E-cadherin                                              | 610181, BD Transduction Laboratories, San Jose, CA, USA        | 1:5000 for WB  |
| Vimentin                                                | #5741, Cell Signaling Technology, Beverly, MA, USA             | 1:20000 for WB |
| GAPDH                                                   | KC-5G4, KangChen Bio-tech, Shanghai, China                     | 1:20000 for WB |
| Phospho-p44/42 MAPK (Erk1/2) (Thr202/Tyr204)            | #4370, Cell Signaling Technology, Beverly, MA, USA             | 1:10000 for WB |
| p44/42 MAPK (Erk1/2)                                    | #4695, Cell Signaling Technology, Beverly, MA, USA             | 1:10000 for WB |
| c-Jun Phospho (pS63) (JUN)                              | 1527-1, Epitomics, Burlingame, CA, USA                         | 1:1000 for WB  |
| c-Jun (JUN)                                             | 1254-1, Epitomics, Burlingame, CA, USA                         | 1:1000 for WB  |
| Phospho-p38 MAPK (Thr180/Tyr182)                        | #4511, Cell Signaling Technology, Beverly, MA, USA             | 1:1000 for WB  |
| p38 MAPK                                                | #8690, Cell Signaling Technology, Beverly, MA, USA             | 1:1000 for WB  |
| Horseradish peroxidase (HRP) conjugated anti-rabbit IgG | Jackson Immuno Research Laboratories, Inc. West Grove, PA, USA | 1:5000 for WB  |
| HRP conjugated anti-mouse IgG                           | Jackson Immuno Research Laboratories, Inc. West Grove, PA, USA | 1:5000 for WB  |
